# Supplementary material for: Ir–Re alloy as a highly active catalyst for the hydrogenolysis of glycerol to 1,3-propanediol
Source: Royal Society of Chemistry journal article supplement (doi:10.1039/c4cy01285b), 2014-11-24
Supplement: c4cy01285b1.pdf [file c4cy01285b1.pdf]

## Supporting Information

### Ir-Re Alloy as a highly active catalyst for the hydrogenolysis of glycerol to 1,3-propanediol

Chenghao Deng<sup>a</sup>, Xuezhi Duan<sup>a</sup>, Jinghong Zhou<sup>\*a</sup>, Xinggui Zhou<sup>a</sup>, Weikang Yuan<sup>a</sup>

and Susannah L. Scott<sup>\*b</sup>

<sup>a</sup> State Key Laboratory of Chemical Engineering, East China University of Science and Technology, Shanghai, 200237, P. R. China.

<sup>b</sup> Department of Chemical Engineering, University of California, Santa Barbara, CA 93106-5080, USA.

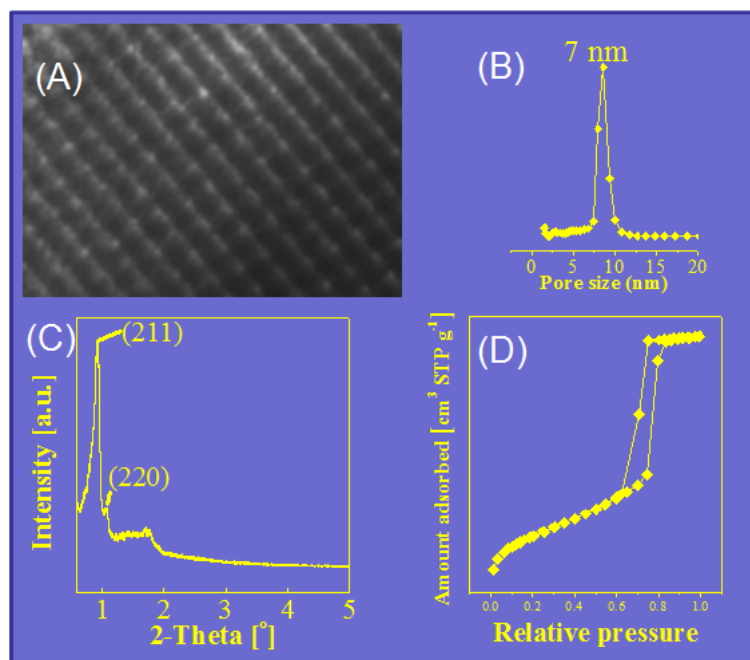

**Figure S1.** Properties of as-synthesized KIT-6 support: (A) TEM, (B) pore size distribution, (C) small-angle XRD, and (D) N<sub>2</sub>-adsorption isotherm.

**Table S1.** Comparison of performance of heterogeneous catalysts in batch glycerol

hydrogenolysis

| Catalyst                                  | Solvent<br>/additive                            | $P_{H_2}$ <sup>a</sup> /T <sup>b</sup> /t <sup>c</sup> /GLY<br><sup>d</sup> | 1,3-PD<br>formation rate <sup>e</sup> | Ref.      |
|-------------------------------------------|-------------------------------------------------|-----------------------------------------------------------------------------|---------------------------------------|-----------|
| Ir-Re/KIT6-R                              | H <sub>2</sub> O/Amberlyst-15                   | 8.0/393/12/43                                                               | 25.6                                  | This work |
| Ir-Re/KIT6-R                              | H <sub>2</sub> O                                | 8.0/393/12/43                                                               | 17.2                                  | This work |
| Ir-ReO <sub>x</sub> /SiO <sub>2</sub>     | H <sub>2</sub> O/H <sub>2</sub> SO <sub>4</sub> | 8.0/393/24/43                                                               | 15.4                                  | [4i]      |
| Ir-ReO <sub>x</sub> /SiO <sub>2</sub>     | H <sub>2</sub> O                                | 8.0/393/24/43                                                               | 9.1                                   | [4i]      |
| Pt/sulfated ZrO <sub>2</sub>              | DMI <sup>c</sup>                                | 7.3/443/24/43                                                               | 6.8                                   | [4e]      |
| Pt/WO <sub>x</sub> /AlOOH                 | H <sub>2</sub> O                                | 5.0/453/12/1.0                                                              | 6.0                                   | [4h]      |
| Pt-Re/C                                   | H <sub>2</sub> O                                | 4.0/443/8.0/2.2                                                             | 5.7                                   | [4b]      |
| Pt/WO <sub>3</sub> /ZrO <sub>2</sub>      | DMI <sup>f</sup>                                | 8.0/443/24/3.0                                                              | 4.0                                   | [12]      |
| Pt/WO <sub>3</sub> /TiO <sub>2</sub> /SiO | H <sub>2</sub> O                                | 5.5/453/12/43                                                               | 2.8                                   | [13]      |

2

<sup>a</sup> Hydrogen pressure (MPa); <sup>b</sup> Reaction temperature (K); <sup>c</sup> Reaction time (h); <sup>d</sup> Glycerol (mmol); <sup>e</sup> mol<sub>1,3PD</sub> mol<sub>metal</sub><sup>-1</sup> h<sup>-1</sup>; <sup>f</sup> Dimethyl imidazolinone (DMI).

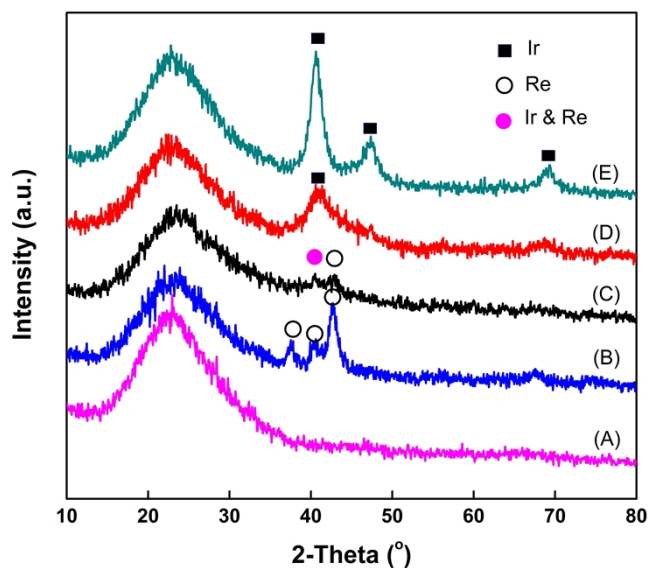

**Figure S2.** Powder XRD patterns for KIT-6 (A), Re/KIT-6-R (B), Ir-Re/KIT-6-R (C), Ir-Re/KIT-6-CR (D) and Ir/KIT-6-CR (E).

The powder X-ray diffraction (XRD) patterns are shown in Figure S2. For Ir-Re/KIT-6-CR, only a broadened diffraction peak at  $40.6^\circ$  assignable to Ir metal is detected; no diffraction peaks due to a Re-containing phase is observed, consistent with previous observations.<sup>4a,4f,5</sup> This result suggests high dispersion of the Re species on the catalysts.<sup>4f</sup> Furthermore, no shift of the diffraction peak was observed for Ir-Re/KIT-6-CR, indicating that no Ir-Re alloy is formed. The XRD pattern for Ir-Re/KIT-6-R exhibits diffraction peaks assignable to the metallic phase of Re, while peaks assignable to the metallic Ir phase cannot be clearly distinguished due to the overlap of Ir(111) at  $40.6^\circ$  (PDF#87-0599) with Re(002) at  $40.4^\circ$  (PDF#87-0715), as shown in Figure S2-C. In addition, the intensity of the diffraction peaks for Ir-Re/KIT-6-R is very weak. This phenomenon is similar to the case observed by H. Karan et al., where they studied the Pt deposition on Ir and Re alloy nanoparticles for oxygen reduction reaction.<sup>S1</sup> They

attributed the phenomenon, for the very small particles, to the surface-segregation of Ir in the Ir-Re alloy.<sup>S1,S3</sup> As a result, sufficient XRD signal could not be produced for such a layer. For this reason, the existence of an Ir-Re alloy phase could not be assessed in the freshly reduced catalyst by XRD. This phenomenon is possibly due to the presence of amorphous Ir-Re alloy for the bimetallic nanoparticles as well as its high dispersion on the support surface.<sup>S1,S2</sup>

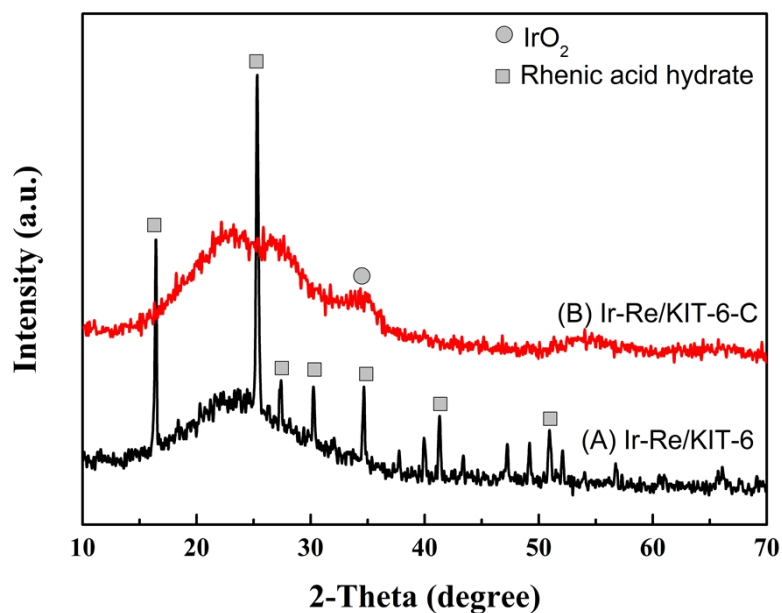

**Figure S3.** XRD patterns of dried Ir-Re/KIT-6 (A) and Ir-Re/KIT-6-C (B).

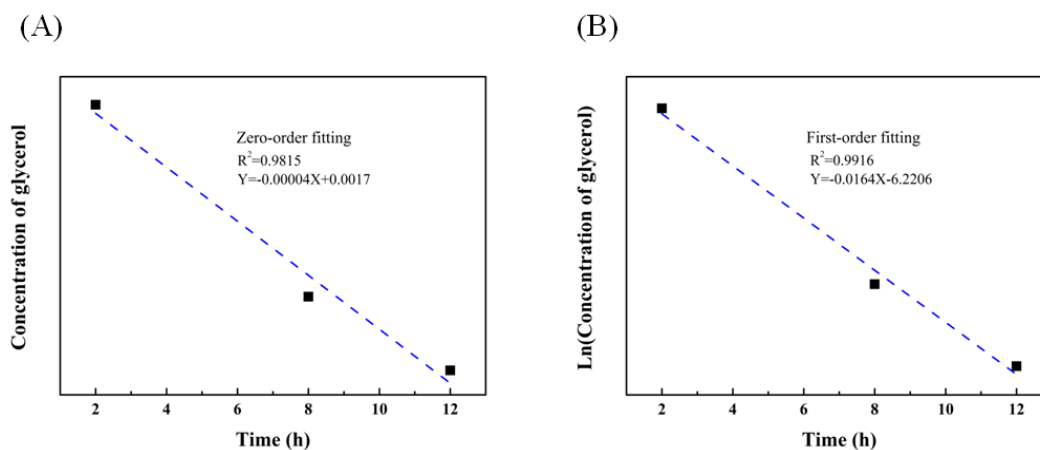

**Figure S4.** Plots of Concentration of glycerol vs. time for Ir-Re/KIT-6-R (A), and  $\ln(\text{Concentration of glycerol})$  vs. time for Ir-Re/KIT-6-CR.

It is known that, in a batch reactor, zero-order and first-order reaction of reactant “A” follows the equations:  $C_A = C_{A0} - kt$  and  $kt = \ln(C_{A0}/C_A)$ , respectively, where the  $C_A$  represents the concentration of reactant A at reaction time “t”, the  $C_{A0}$  represents the initial concentration of reactant A.<sup>S4</sup> We fitted the relationship between concentration of glycerol and time for the two catalysts based on the equations (Fig. S4). It is found that the concentration of glycerol changes with time in a line for Ir-Re/KIT-6-R, demonstrating the reaction order with respect to glycerol is nearly zero. In contrast,  $\ln(\text{Concentration of glycerol})$  changes with time in a line for Ir-Re/KIT-6-CR, showing that the reaction order of glycerol is ca. one rather than zero.

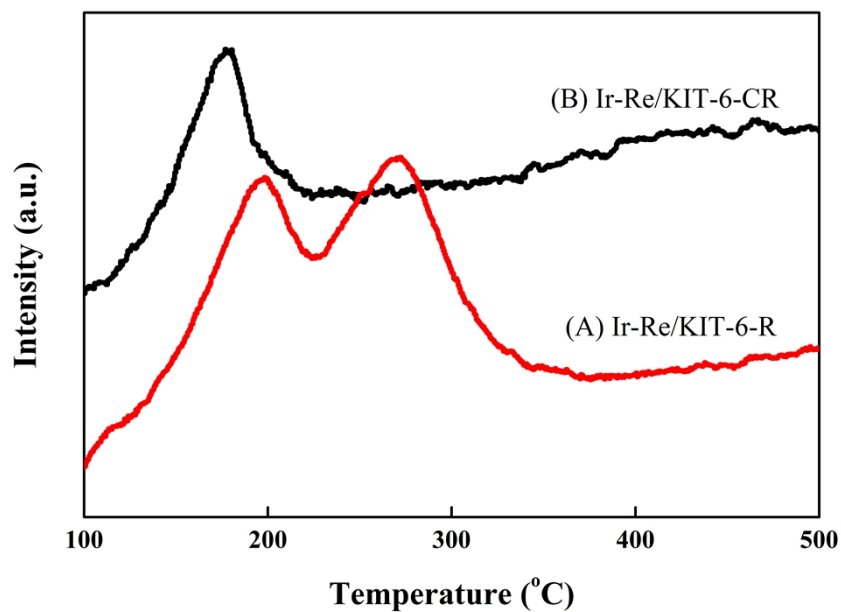

**Figure S5.** NH<sub>3</sub>-TPD profiles of Ir-Re/KIT-6-R (A) and Ir-Re/KIT-6-CR (B).

**Table S2.** Hydrogenolysis of various substrates (glycerol, 1,3-PD and 1,2-PD over Ir-Re/KIT-6-R.

| Substrate | Conv. (%) | Selectivity (%) |        |       |      |
|-----------|-----------|-----------------|--------|-------|------|
|           |           | 1,3-PD          | 1,2-PD | 1-PO  | 2-PO |
| 1,2-PD    | 80.0      | -               | -      | 81.9  | 18.1 |
| 1,3-PD    | 13.6      | -               | -      | 100.0 | -    |
| Glycerol  | 39.7      | 37.1            | 25.8   | 28.0  | 9.1  |

Reaction conditions: 120 °C, 43 mmol substrate, 8 MPa H<sub>2</sub>, 12 h, catalyst (150 mg).

## References

- S1 H. I. Karan, K. Sasaki, K. Kuttiyiel, C. A. Farberow, M. Mavrikakis and R. R. Adzic, *ACS Catal.*, 2012, **2**, 817.
- S2 S. Hirasawa, H. Watanabe, T. Kizuka, Y. Nakagawa and K. Tomishige, *J. Catal.*, 2013, **300**, 205.
- S3 B. Hammer, L. B. Hansen and J. K. Nørskov, *Phys. Rev. B*, 1999, **59**, 7413.
- S4 O. Levenspiel, *Chemical Reaction Engineering*, 2<sup>nd</sup> ed., New York: John Wiley, 1972.
